# Supplementary material for: Honey Bee Pathogen Prevalence and Interactions within the Marmara Region of Turkey
Source: MDPI journal article supplement (doi:10.3390/vetsci9100573), 2022-10-17
Supplement: s1 [file s1]

**Table S1.** Primers used for molecular disease screenings. SB: stonebrood, CB: chalkbrood, AFB: American foulbrood, CER: *Nosema ceranae*, APIS: *Nosema apis*, RpS5: ribosomal protein S5 of *Apis mellifera*.

| Primer | Sequence (5'-3')              | Product length (bp) |     | Ref. |
|--------|-------------------------------|---------------------|-----|------|
| SB-F   | GGTAACCAAATCGGTGCTGCTTTC      | A. fumigatus        | 549 | [1]  |
|        |                               | A. flavus           | 550 |      |
|        |                               | A. niger            | 531 |      |
| SB-R   | ACCCTCAGTGTAGTGACCCTTGGC      | A. terreus          | 564 |      |
|        |                               | A. clavatus         | 562 |      |
|        |                               | A. nidulans         | 475 |      |
| CB-F   | TGTCTGTGCGGCTAGGTG            | 648                 |     | [2]  |
| CB-R   | CCACTAGAAGTAAATGATGGTTAGA     |                     |     |      |
| AFB-F  | TTCGGGAGACGCCAGGTTA           | 131                 |     | [3]  |
| AFB-R  | CTTTCATGACTTCTTCATGCGAAG      |                     |     |      |
| CER-F  | CGGCGACGATGTGATATGAAAATATTAA  | 218                 |     | [4]  |
| CER-R  | CCCGGTCATTCTCAAACAAAAAACCG    |                     |     |      |
| APIS-F | GGGGGCATGTCTTTGACGTACTATGTA   | 321                 |     |      |
| APIS-R | GGGGGGCGTTTAAAATGTGAAACAACATG |                     |     |      |
| RpS5-F | AATTATTGGTCGCTGGAATTG         | 115                 |     | [5]  |
| RpS5-R | TAACGTCCAGCAGAATGTGGTA        |                     |     |      |

**Table S2.** Comparisons in residual deviance between models containing no interactions, ABPV-BQCV interaction, DWV-KV-VDV1 interactions, and ABPV-BQCV and DWV-KV-VDV1 interactions using the likelihood ratio test for each disease.  $\chi^2$ : Chi-square statistic, Df: degrees of freedom.

| Response variable | Interaction effects | Deviance | $\chi^2$ | Df | <i>p</i> -value |
|-------------------|---------------------|----------|----------|----|-----------------|
| Varroa            | NA                  | 789.67   |          |    |                 |
|                   | ABPV-BQCV           | 788.80   | 0.8620   | 1  | 0.35            |
|                   | DWV-KV-VDV1         | 784.88   | 3.9198   | 2  | 0.14            |
|                   | All                 | 783.78   | 1.1074   | 1  | 0.29            |
| SB                | NA                  | 117.92   |          |    |                 |
|                   | ABPV-BQCV           | 117.19   | 0.73     | 1  | 0.39            |
|                   | DWV-KV-VDV1         | 113.87   | 3.32     | 2  | 0.19            |
|                   | All                 | 113.09   | 0.78     | 1  | 0.38            |
| Nosema            | NA                  | 156.23   |          |    |                 |
|                   | ABPV-BQCV           | 156.14   | 0.09     | 1  | 0.77            |
|                   | DWV-KV-VDV1         | 153.89   | 2.26     | 2  | 0.32            |
|                   | All                 | 153.74   | 0.15     | 1  | 0.70            |
| AFB               | NA                  | 134.45   |          |    |                 |
|                   | ABPV-BQCV           | 133.85   | 0.60     | 1  | 0.44            |
|                   | DWV-KV-VDV1         | 131.64   | 2.21     | 2  | 0.33            |
|                   | All                 | 131.27   | 0.37     | 1  | 0.54            |
| DWV               | NA                  | 3625.1   |          |    |                 |

|      |             |        |       |   |        |
|------|-------------|--------|-------|---|--------|
|      | KV-VDV1     | 3606.4 | 18.67 | 3 | <0.001 |
|      | All         | 3606.3 | 0.07  | 2 | 0.79   |
| KV   | NA          | 3407.2 |       |   |        |
|      | ABPV-BQCV   | 3406.8 | 0.43  | 0 | NA     |
|      | DWV-KV      | 3393.2 | 13.60 | 1 | <0.001 |
|      | All         | 3393.2 | 0.02  | 1 | 0.88   |
| VDV1 | NA          | 3631.6 |       |   |        |
|      | ABPV-BQCV   | 3631.6 | 0     | 0 | NA     |
|      | DWV-KV      | 3614.5 | 17.16 | 1 | <0.001 |
|      | All         | 3611.1 | 20.53 | 2 | <0.001 |
| ABPV | NA          | 2194.0 |       |   |        |
|      | DWV-KV-VDV1 | 2187.9 | 6.08  | 3 | 0.11   |
| BQCV | NA          | 3145.0 |       |   |        |
|      | DWV-KV-VDV1 | 3144.4 | 0.65  | 3 | 0.88   |

## References

1. Nasri, T.; Hedayati, M.T.; Abastabar, M.; Pasqualotto, A.C.; Armaki, M.T.; Hoseinnejad, A.; Nabili, M. PCR-RFLP on  $\beta$ -Tubulin Gene for Rapid Identification of the Most Clinically Important Species of *Aspergillus*. *J. Microbiol. Methods* **2015**, *117*, 144–147, <https://doi.org/10.1016/j.mimet.2015.08.007>.
2. James, R.R.; Skinner, J.S. PCR Diagnostic Methods for *Ascosphaera* Infections in Bees. *J. Invertebr. Pathol.* **2005**, *90*, 98–103, <https://doi.org/10.1016/j.jip.2005.08.004>.
3. Rossi, F.; Amadoro, C.; Ruberto, A.; Ricchiuti, L. Evaluation of Quantitative PCR (QPCR) *Paenibacillus* Larvae Targeted Assays and Definition of Optimal Conditions for Its Detection/Quantification in Honey and Hive Debris. *Insects* **2018**, *9*, 165, <https://doi.org/10.3390/insects9040165>.
4. Hamiduzzaman, M.Md.; Guzman-Novoa, E.; Goodwin, P.H. A Multiplex PCR Assay to Diagnose and Quantify *Nosema* Infections in Honey Bees (*Apis Mellifera*). *J. Invertebr. Pathol.* **2010**, *105*, 151–155, <https://doi.org/10.1016/j.jip.2010.06.001>.

5. Thompson, G.J.; Yockey, H.; Lim, J.; Oldroyd, B.P. Experimental Manipulation of Ovary Activation and Gene Expression in Honey Bee (*Apis Mellifera*) Queens and Workers: Testing Hypotheses of Reproductive Regulation. *J. Exp. Zool. Part Ecol. Genet. Physiol.* **2007**, *307A*, 600–610, <https://doi.org/10.1002/jez.415>.
